# Supplementary material for: Overexpression of LINC00160 predicts poor outcome and promotes progression of clear cell renal cell carcinoma
Source: publisher site journal article supplement (doi:10.18632/aging.103091), 2020-04-21
Supplement: Supplementary file [file aging-v12i8-103091-supplementary-material-SD1.pdf]

# SUPPLEMENTARY FIGURES

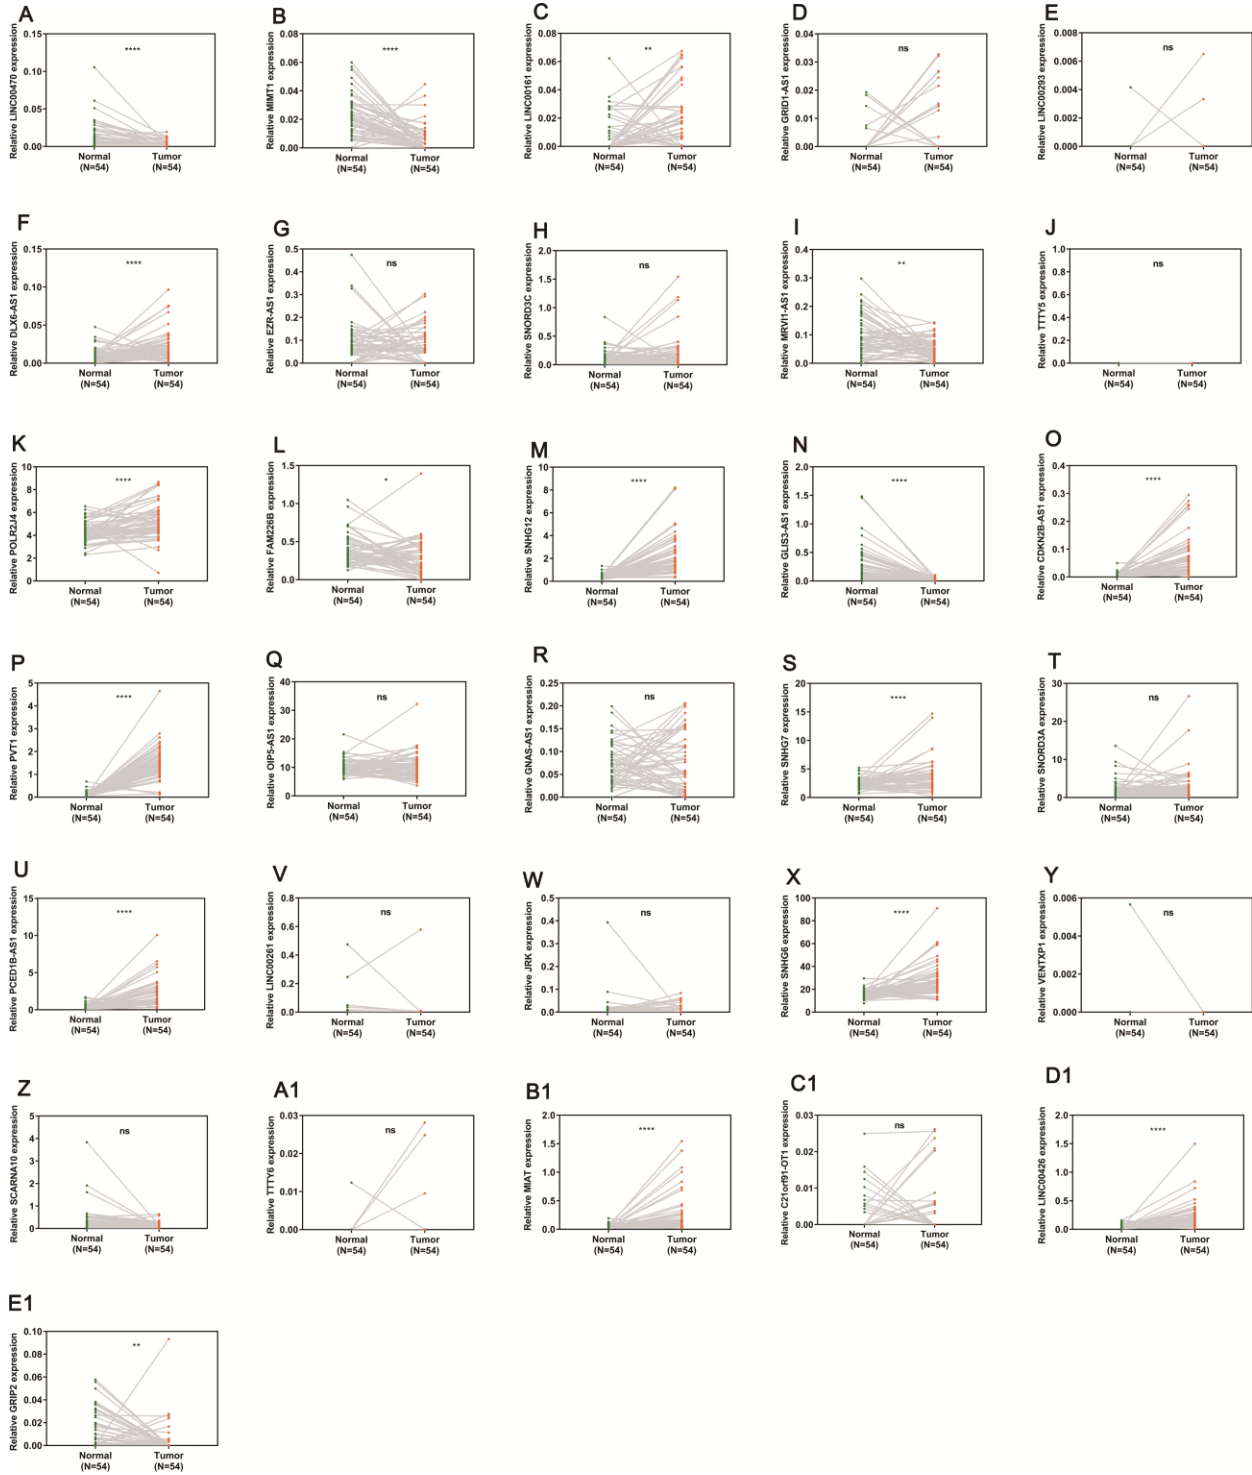

**Supplementary Figure 1. Paired student's *t*-tests of the 36 upregulated lncRNAs. (A–E1) Relative gene expression comparison of 54 paired tissues in the TCGA-KIRC database.**

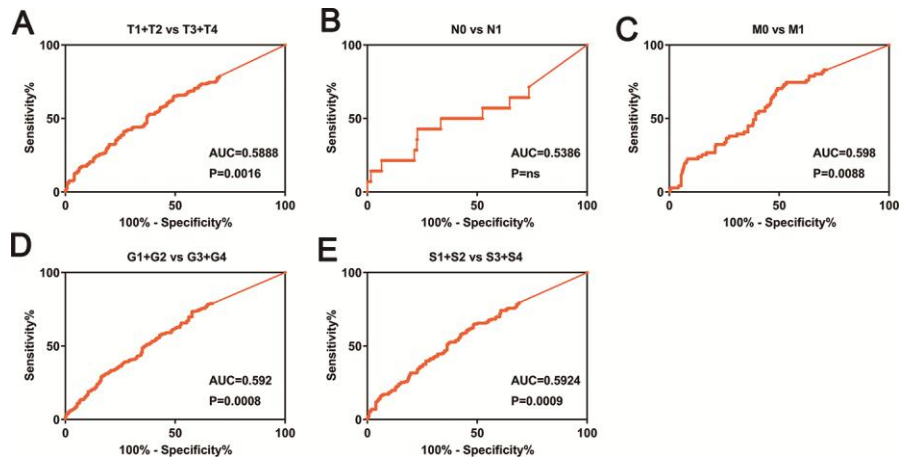

**Supplementary Figure 2.** ROC curves were used to distinguish between the G1+G2 and G3+G4, M0 and M1, N0 and N1, T1+T2 and T3+T4, and Stage I+II and Stage III+IV patient samples. (A) T1+T2 versus T3+T4. (B) N0 versus N1. (C) M0 versus M1. (D) G1+G2 versus G3+G4. (E) Stage I+II versus Stage III+IV.
